# Supplementary material for: Prediction of Suitable Distribution of a Critically Endangered Plant Glyptostrobus pensilis
Source: MDPI journal article supplement (doi:10.3390/f13020257), 2022-02-07
Supplement: s1 [file s1]

**Table S1** 27 species presence data for Maxent modeling.

| Number | Longitude | Latitude |
|--------|-----------|----------|
| 1      | 119.4162  | 25.72617 |
| 2      | 119.325   | 27.19945 |
| 3      | 119.15    | 26.68904 |
| 4      | 119.0353  | 26.89387 |
| 5      | 118.8623  | 27.00615 |
| 6      | 118.8158  | 25.55034 |
| 7      | 118.5293  | 26.05559 |
| 8      | 118.4092  | 25.76508 |
| 9      | 118.3262  | 26.08217 |
| 10     | 117.7625  | 28.35442 |
| 11     | 117.5252  | 28.49783 |
| 12     | 117.3524  | 28.35964 |
| 13     | 117.2628  | 28.2192  |
| 14     | 116.9694  | 28.2807  |
| 15     | 113.7004  | 23.58032 |
| 16     | 113.5373  | 26.21137 |
| 17     | 113.2591  | 22.39246 |
| 18     | 112.3101  | 24.3201  |
| 19     | 111.0501  | 22.01009 |
| 20     | 108.2839  | 12.98667 |
| 21     | 108.2825  | 12.93528 |
| 22     | 108.2811  | 13.22944 |
| 23     | 105.5364  | 17.90028 |
| 24     | 105.4833  | 17.88333 |
| 25     | 105.2378  | 18.02694 |
| 26     | 105.2333  | 18.01667 |
| 27     | 119.3419  | 26.49986 |
