# Supplementary material for: Prediction of Suitable Distribution of a Critically Endangered Plant Glyptostrobus pensilis
Source: MDPI journal article supplement (doi:10.3390/f13020257), 2022-02-07
Supplement: s1 [file s1]

**Fractional value**

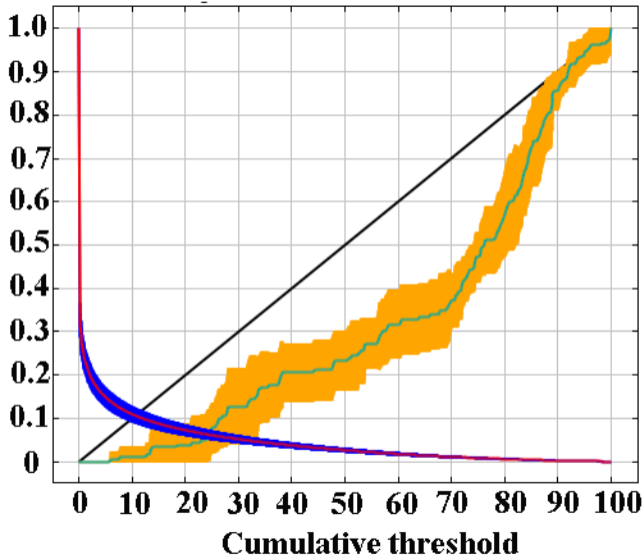

- Mean area
- Mean area +/- one stddev
- Mean omission on training data
- Mean omission +/- one stddev
- Predicted omission
