# Supplementary material for: Prediction of Suitable Distribution of a Critically Endangered Plant Glyptostrobus pensilis
Source: MDPI journal article supplement (doi:10.3390/f13020257), 2022-02-07
Supplement: s1 [file s1]

Table S4 Change rate of suitable habitats areas of *G. pensilis* under different climate change scenarios (%)

| Period       | Area (×10 <sup>4</sup> km <sup>2</sup> ) |          |      |        | 变化 Change(%)     |                  |              |                |
|--------------|------------------------------------------|----------|------|--------|------------------|------------------|--------------|----------------|
|              | Reserved                                 | Increase | Lost | Change | Increase<br>rate | Reserved<br>rate | Lost<br>rate | Change<br>rate |
| LIG          | 4.97                                     | 6.90     | 4.09 | 0.88   | 41.86            | 58.11            | 34.46        | 7.40           |
| LGM          | 3.52                                     | 8.44     | 9.46 | -5.93  | 29.69            | 71.09            | 79.66        | -49.98         |
| MH           | 9.36                                     | 2.66     | 3.55 | 5.82   | 78.87            | 22.42            | 29.87        | 48.99          |
| Current      | 11.87                                    |          |      |        |                  |                  |              |                |
| RCP2.6-2050s | 7.10                                     | 0.39     | 4.80 | 2.30   | 59.82            | 3.31             | 40.41        | 19.41          |
| RCP2.6-2070s | 9.71                                     | 3.42     | 2.52 | 7.19   | 81.85            | 28.81            | 21.23        | 60.61          |
| RCP8.5-2050s | 8.51                                     | 2.82     | 3.54 | 4.98   | 71.72            | 23.74            | 29.79        | 41.93          |
| RCP8.5-2070s | 8.24                                     | 2.90     | 4.02 | 4.22   | 69.40            | 24.44            | 33.85        | 35.55          |
