# Supplementary material for: Prediction of Suitable Distribution of a Critically Endangered Plant Glyptostrobus pensilis
Source: MDPI journal article supplement (doi:10.3390/f13020257), 2022-02-07
Supplement: s1 [file s1]

**Table S3** The mean area under the curve (AUC) from 10 replicate models of *Glyptostrobos pensilis* under three past, present and eight future climate scenarios. Values in parenthesis represent standard deviation.

| Scenarios                 | AUC <sub>TRAIN</sub> | AUC <sub>TEST</sub> |
|---------------------------|----------------------|---------------------|
| <sup>1</sup> LIG          | 0.981(0.0021)        | 0.9774(0.0066)      |
| <sup>2</sup> LGM          | 0.9948 (0.0004)      | 0.9948(0.0012)      |
| <sup>3</sup> MH           | 0.9822(0.0024)       | 0.9787(0.0056)      |
| Current                   | 0.9784(0.0008)       | 0.9773(0.0085)      |
| <sup>4</sup> RCP2.6-2050s | 0.9822(0.0021)       | 0.978(0.0052)       |
| RCP2.6-2070s              | 0.9765(0.0030)       | 0.9778(0.0076)      |
| RCP8.5-2050s              | 0.9796(0.0016)       | 0.9745(0.0011)      |
| RCP8.5-2070s              | 0.9795(0.0021)       | 0.9779(0.0075)      |

<sup>1</sup>LIG, last inter-glacial

<sup>2</sup>LGM, last glacial maximum

<sup>3</sup>MH, the Mid Holocene

<sup>4</sup>RCP, Representative Concentration Pathways
