# Supplementary figures and images for: Prediction of Suitable Distribution of a Critically Endangered Plant Glyptostrobus pensilis
Source: MDPI journal article supplement (doi:10.3390/f13020257), 2022-02-07

avg.test.or10pct

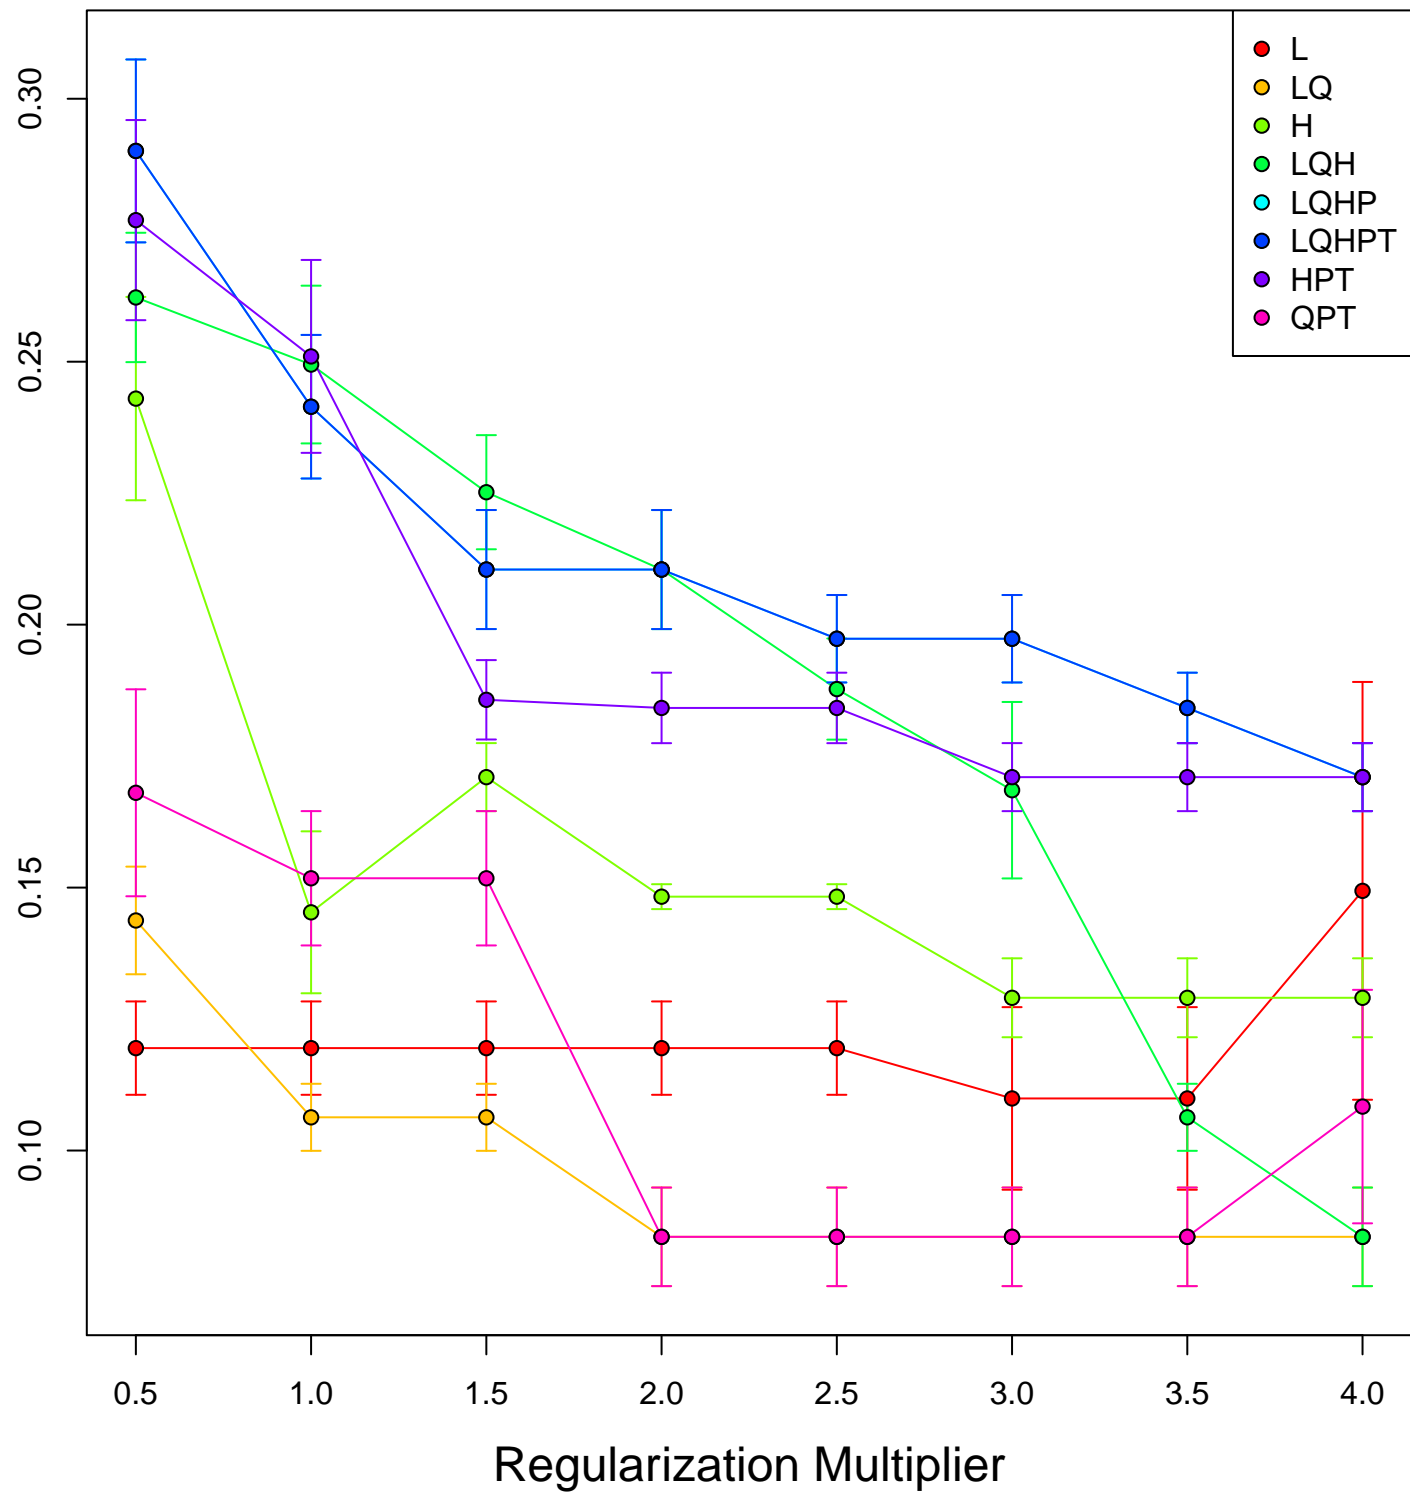

Supplement: s1 [file s1]

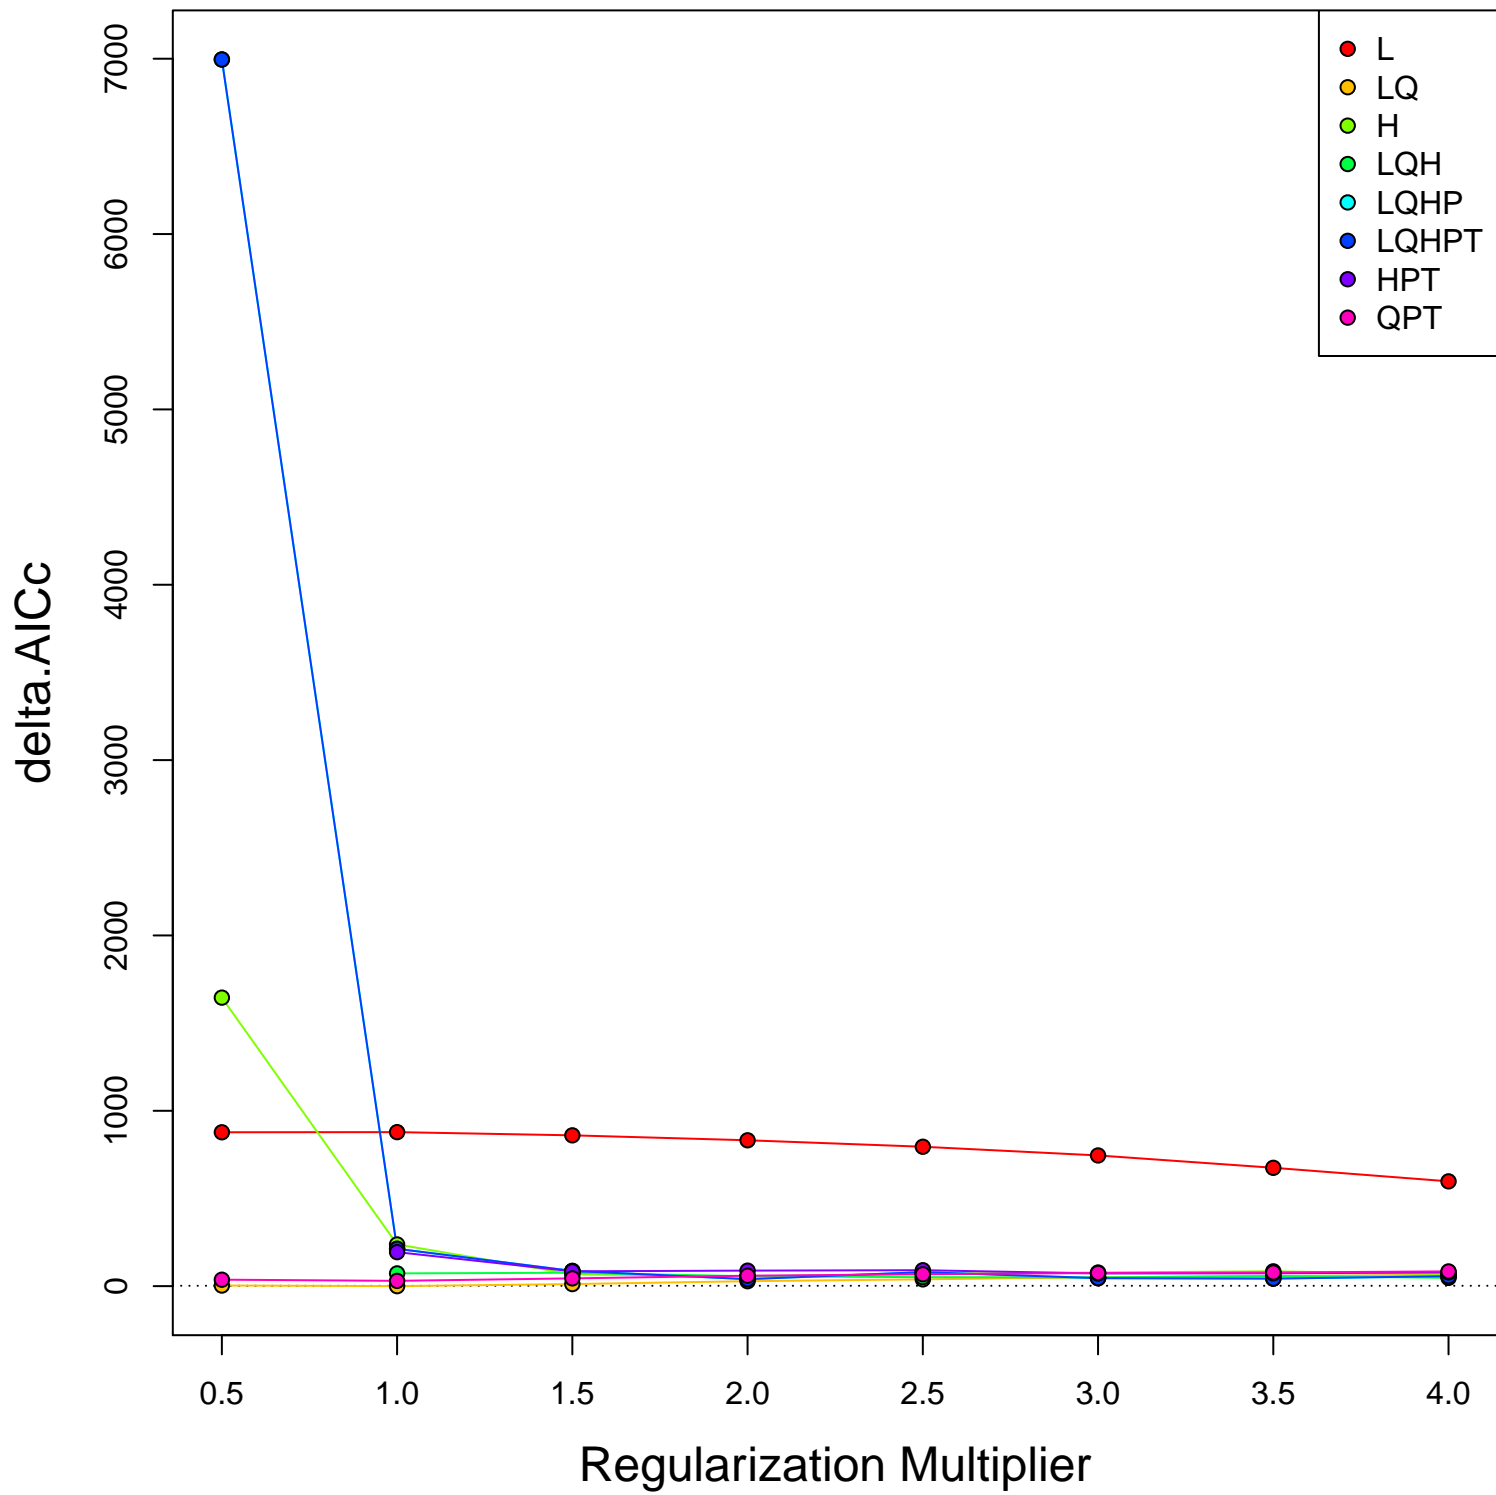

Supplement: s1 [file s1]

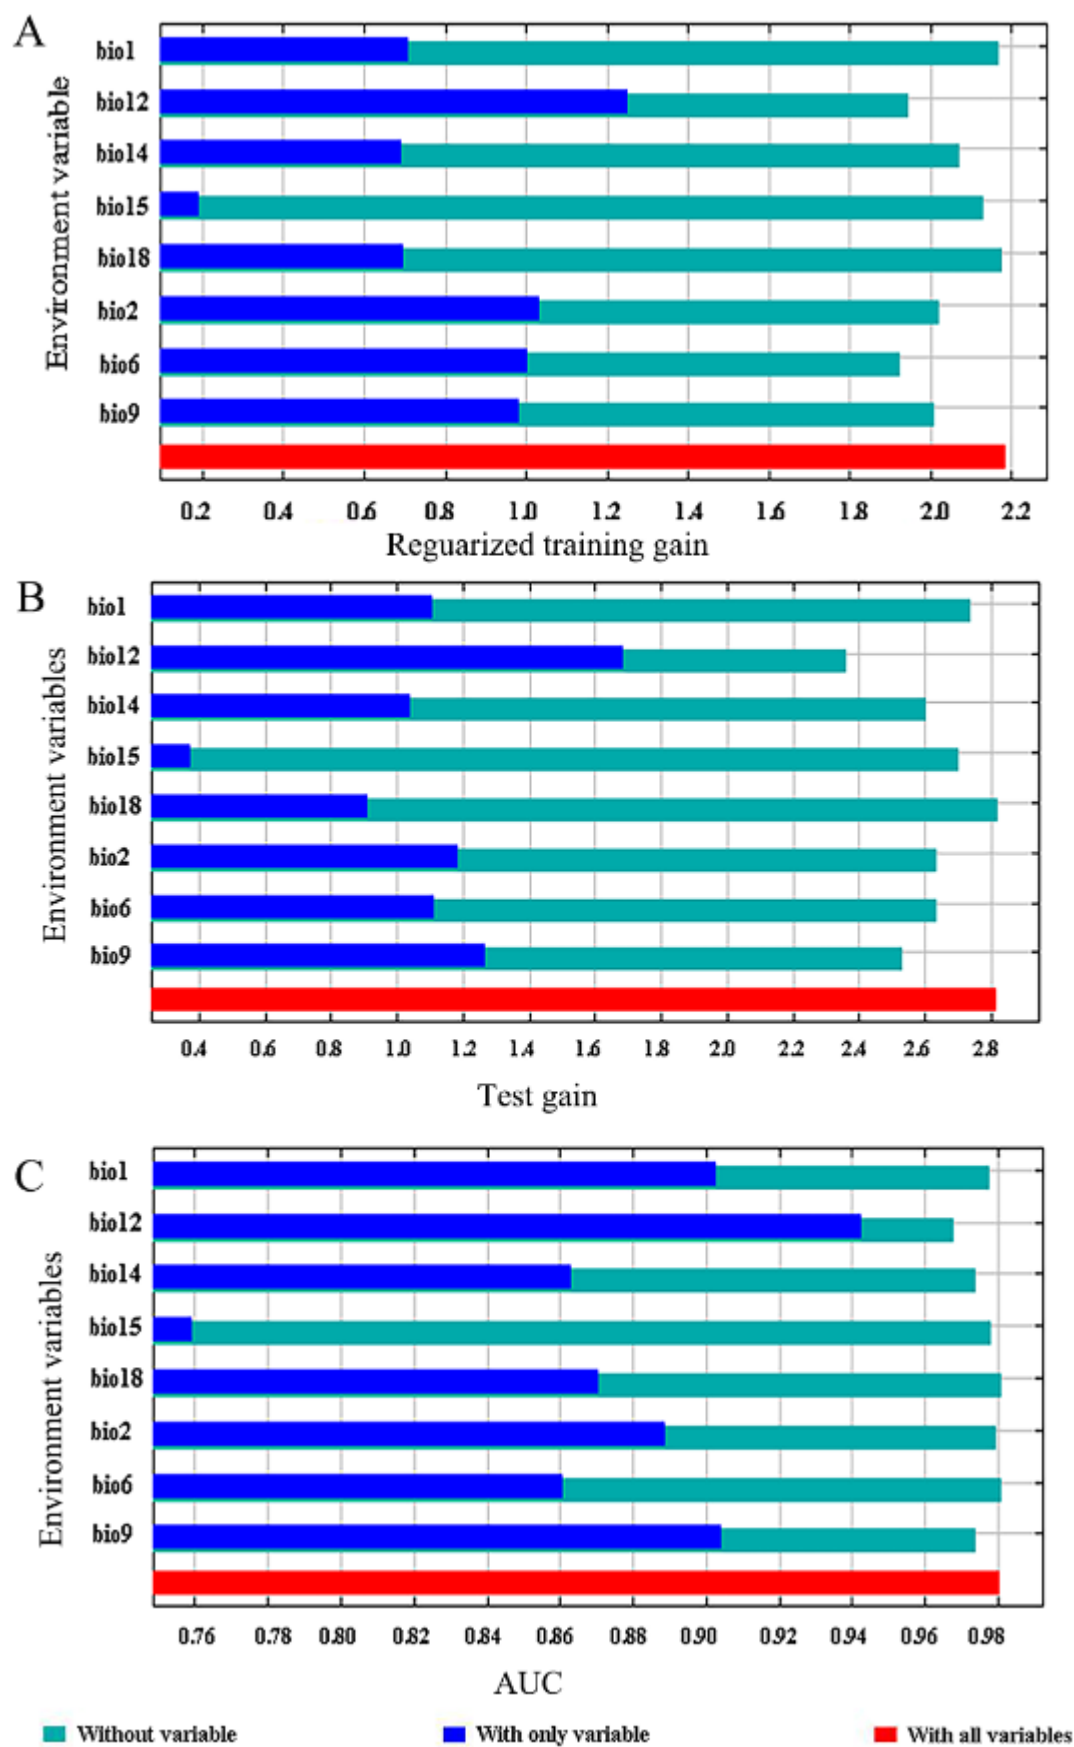

Supplement: s1 [file s1]

avg.test.orMTP

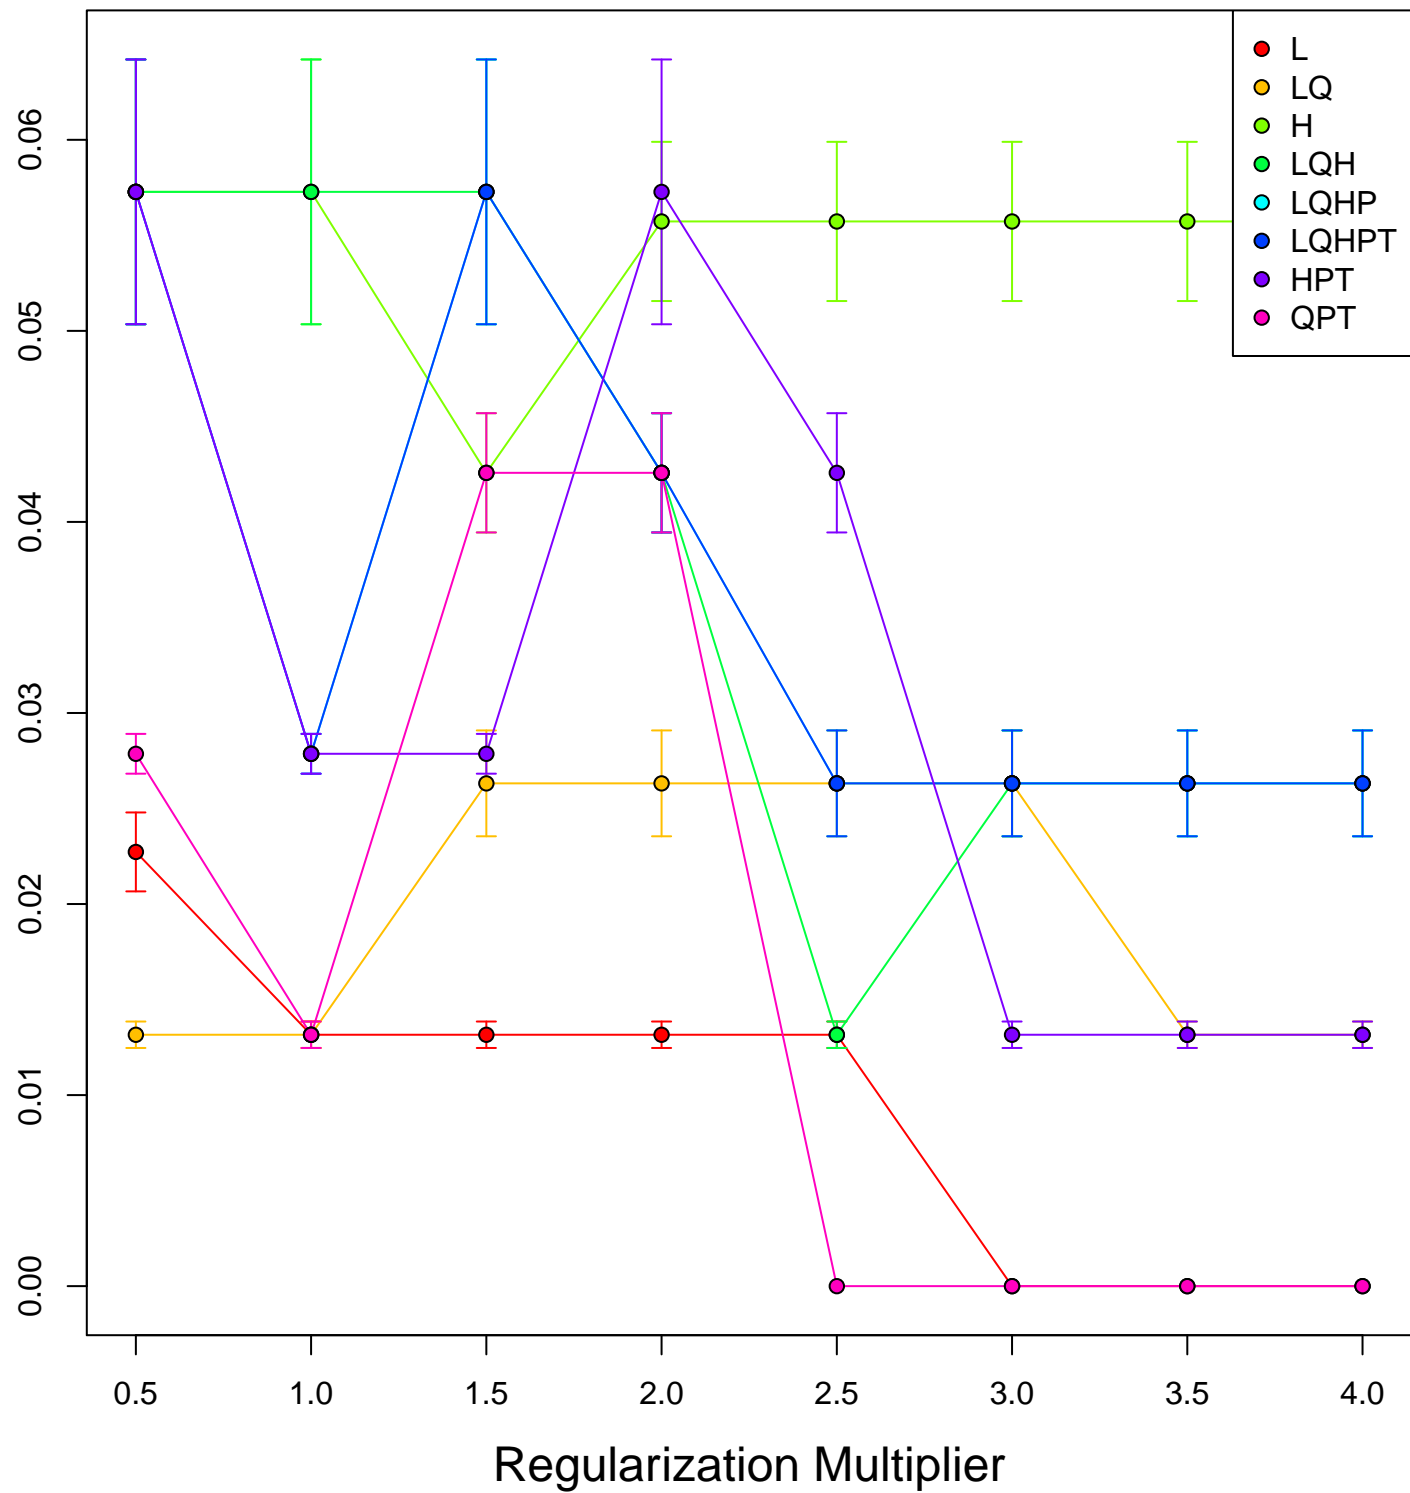

Supplement: s1 [file s1]

avg.diff.AUC

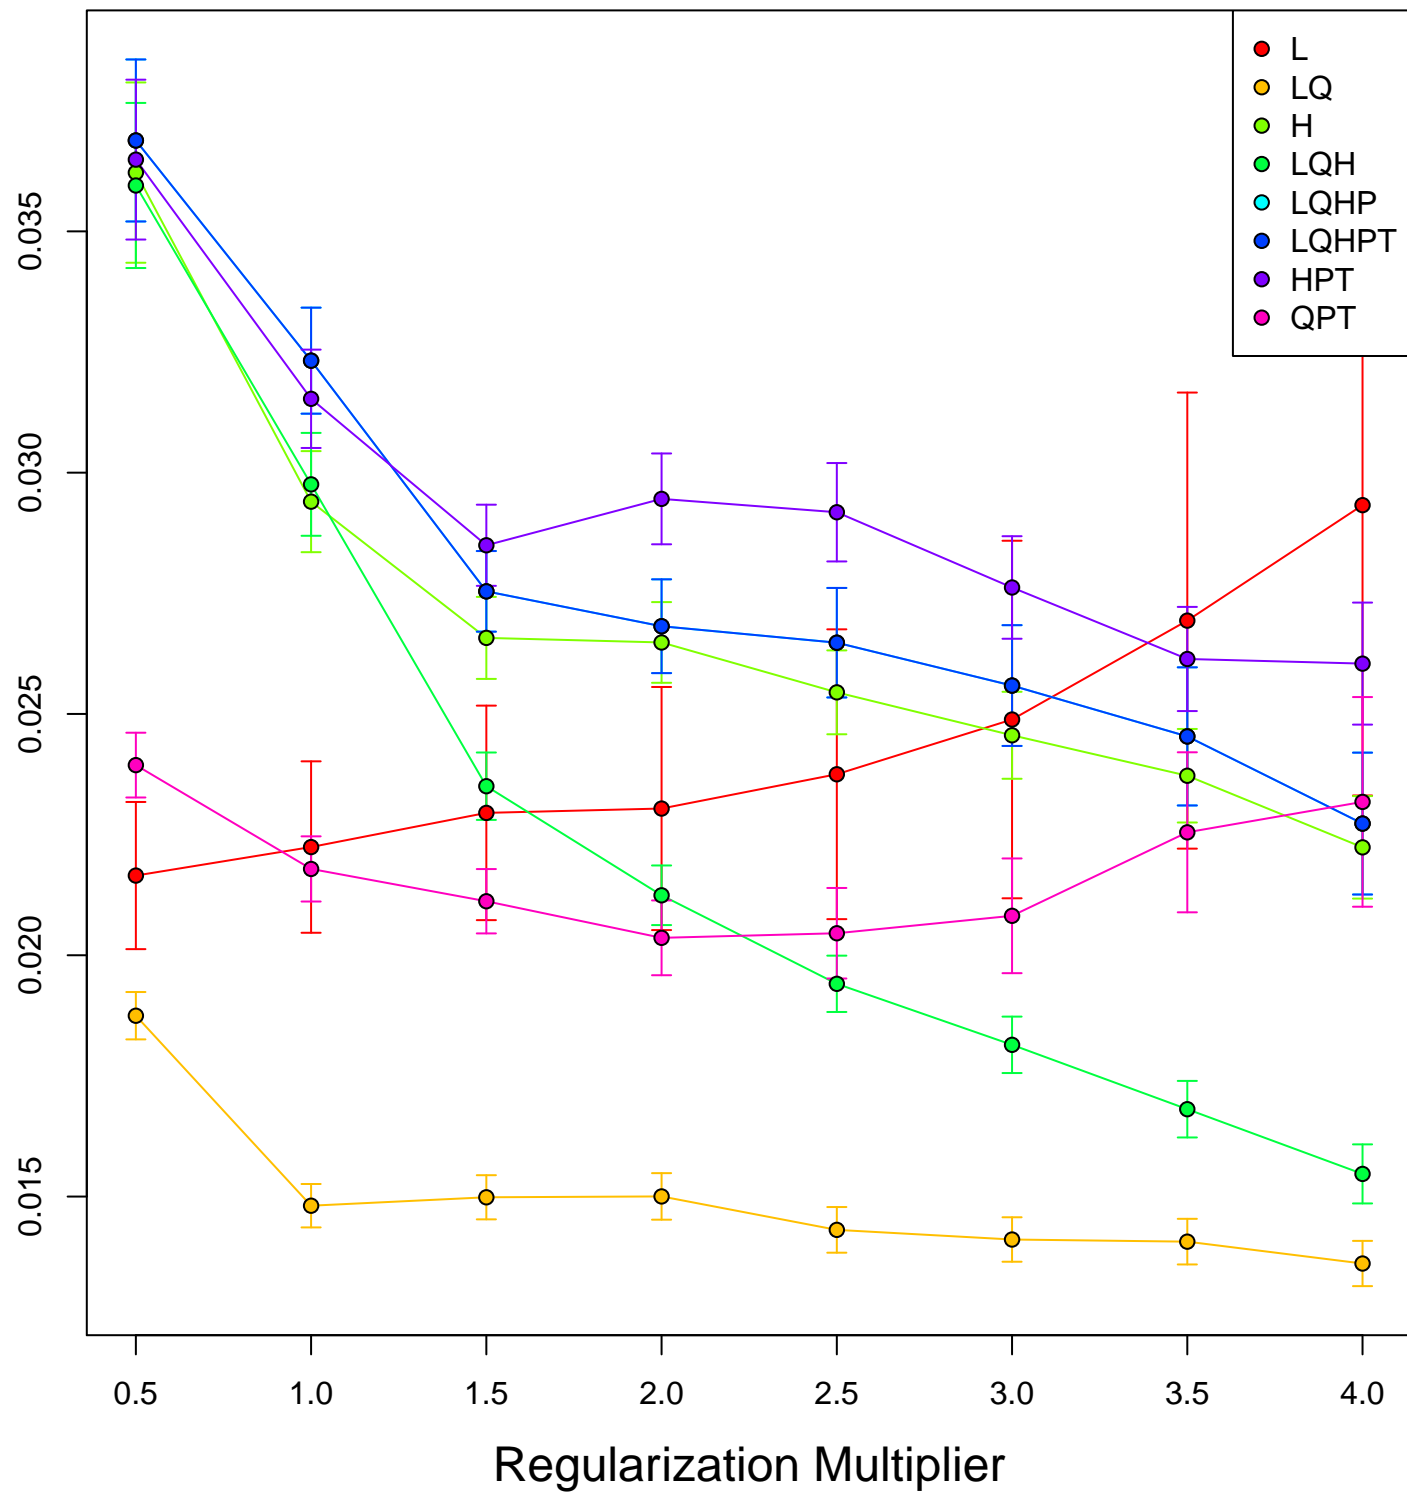

Supplement: s1 [file s1]

Sensitivity(1-omission Rate)

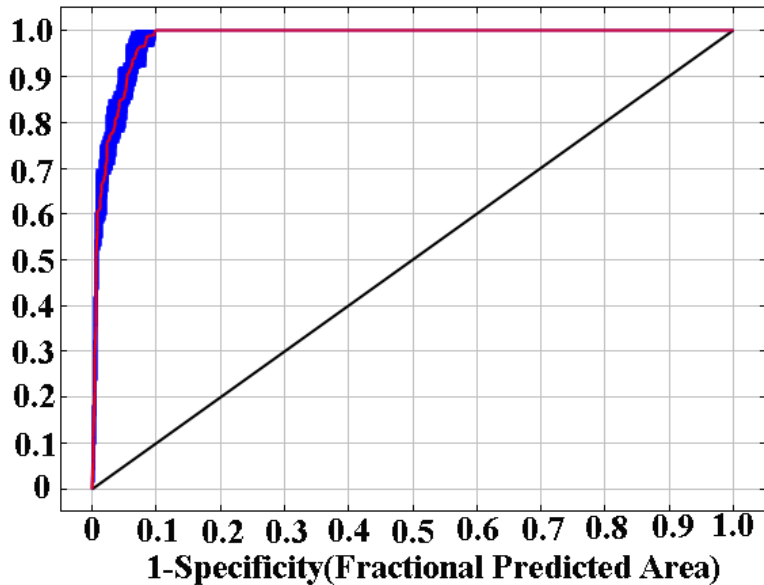

Mean(AUC=0.981) ■  
Mean +/- one stddev ■  
Random Prediction ■

Supplement: s1 [file s1]

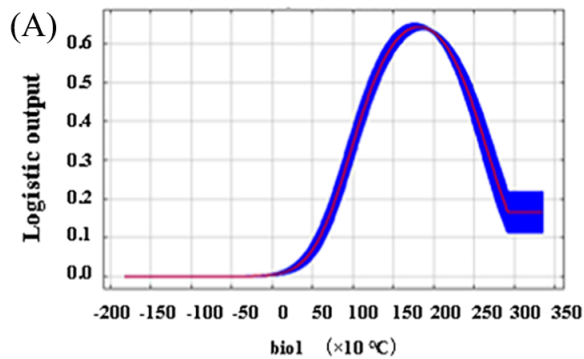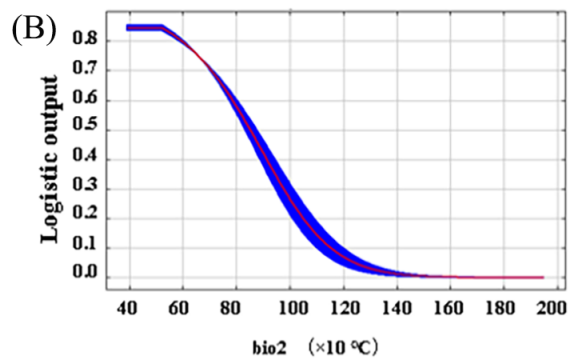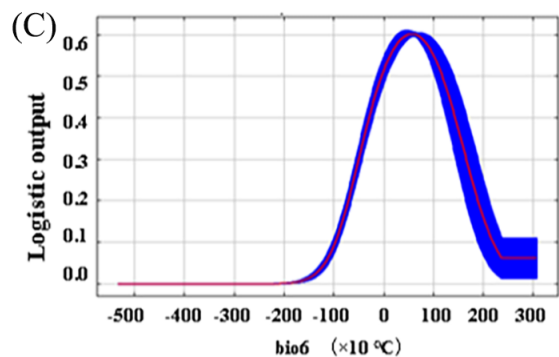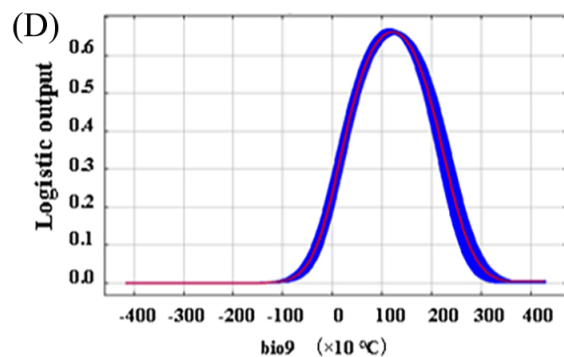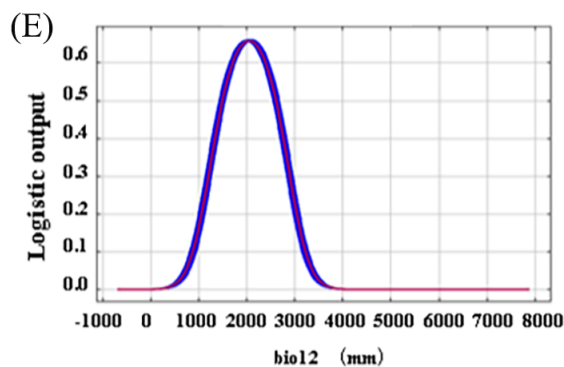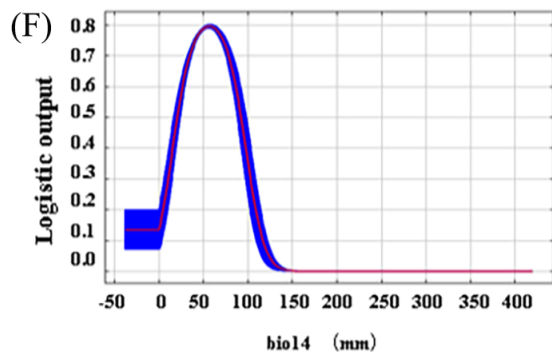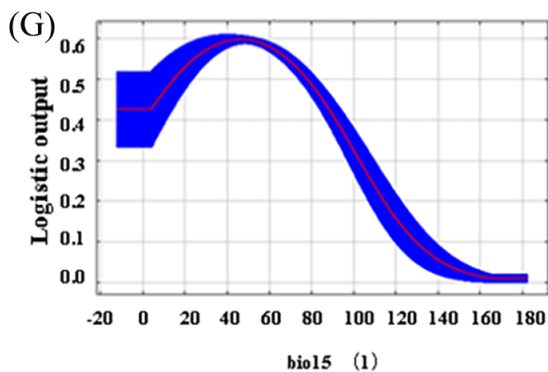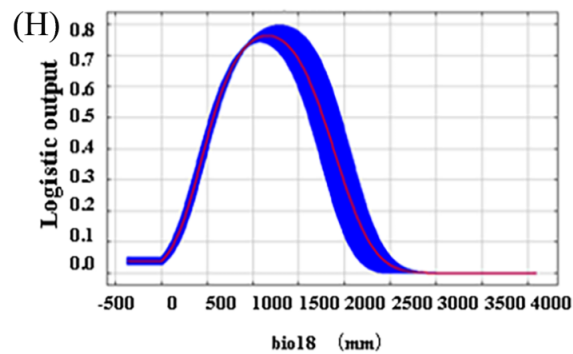

Supplement: s1 [file s1]

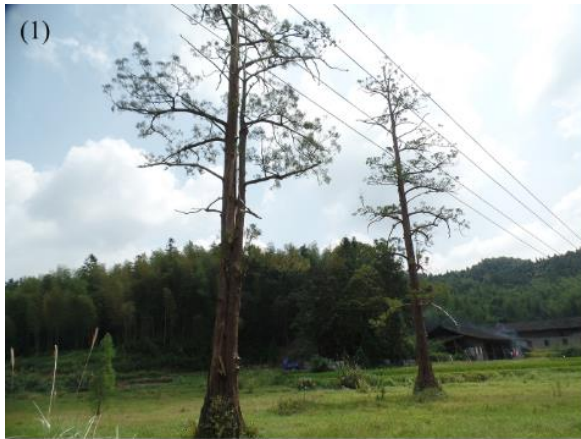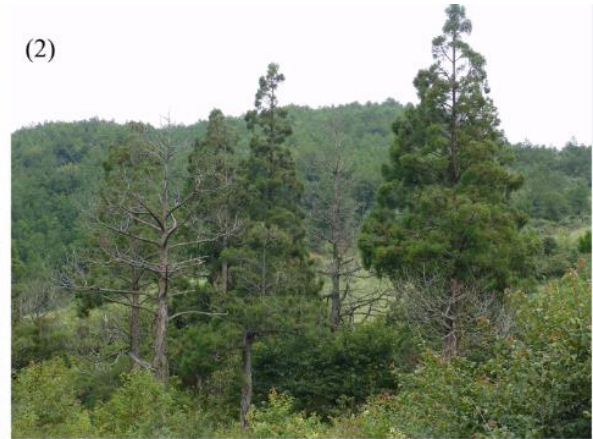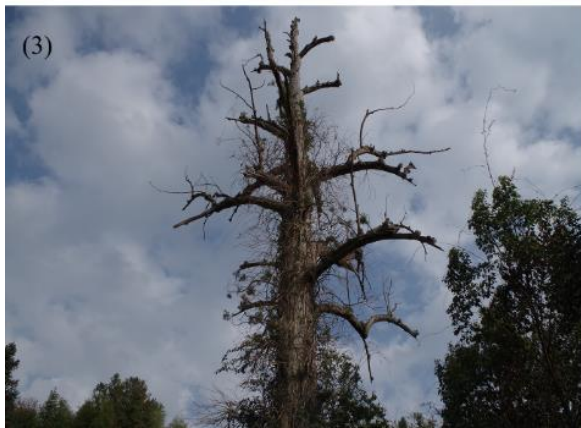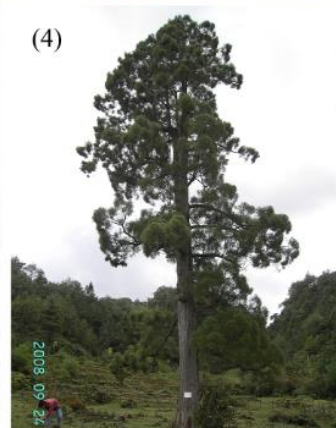

- (1) Luoyuan county
- (2) Youxi county
- (3) Datian county
- (4) Dehua County

Supplement: s1 [file s1]

avg.test.AUC

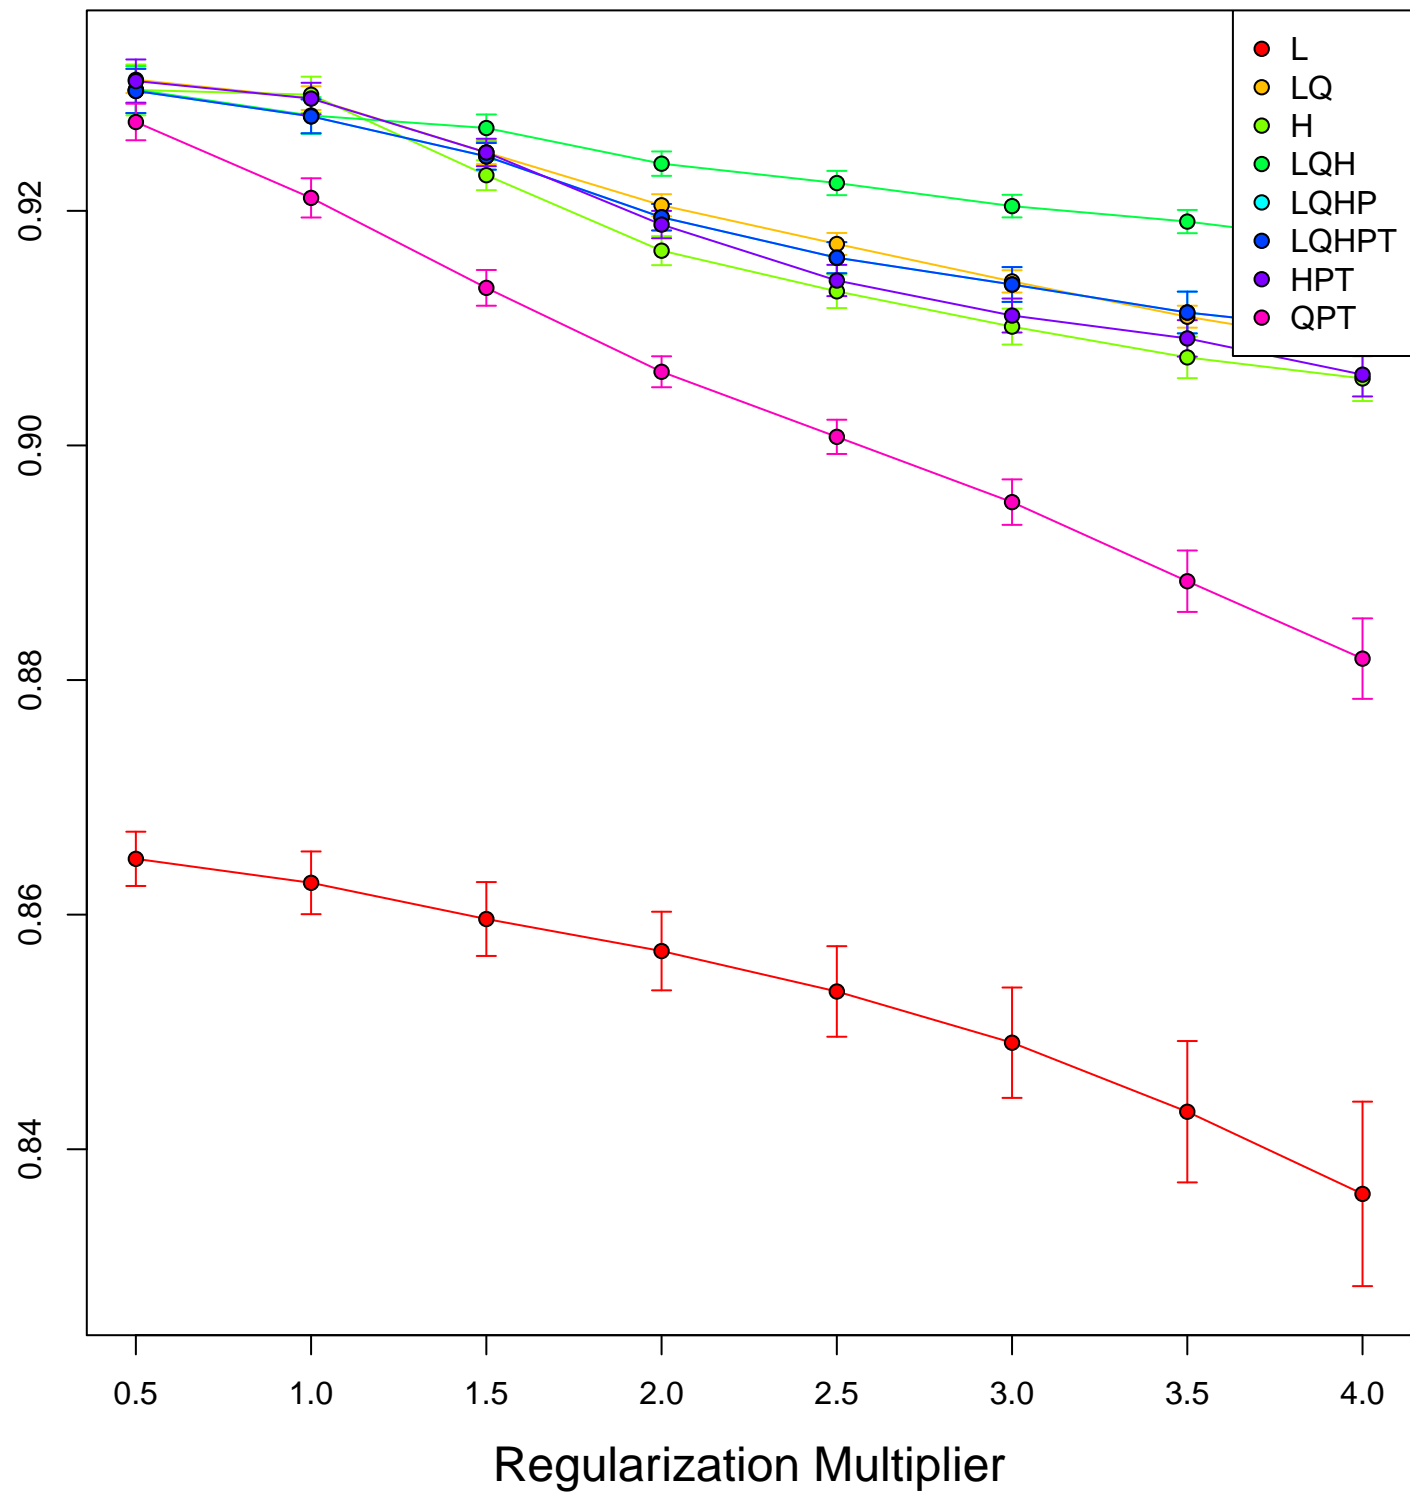

Supplement: s1 [file s1]
